# Supplementary material for: Exploring the Prevalence of Hypomineralised Second Primary Molars (HSPM) and Molar Incisor Hypomineralisation (MIH) As Perceived by Northern Italian Dentists: A Comprehensive Survey
Source: Preprints.org preprint supplement (doi:10.20944/preprints202403.1817.v1), 2024-03-29
Supplement: Supplementary file 1 [file supplementary]

**Supplementary Materials:** Figure S1

**Epidemiologic survey on HSPM (Hypomineralised Second Primary Molars) e MIH (Molar Incisors Hypomineralization)**

1. How many pediatric patients are in treatment in your clinical pratice?

Insert number

1. What is the percentage of pediatric patients compared with the total number of patients?

a. 1-25%

b. 25-50% c. 50-75% d. 75-100%

1. What is the percentage of children aged 6-9 years among your pediatric patients?

a. 0-25%

b. 25-50% c. 50-75% d. 75-100%

1. What is the percentage of caries-free children among your patients between 6 and 9 years?

a. None

b. 1-25%
c. 25-50%

d. 50-75%

e. 75-100%

1. What is the frequency of scheduled check-up visits for your patients between 6 and 9 years?

a Y early

b Every six months

c Every three months

d Not periodically, but only out of necessity

6. Of the 6- to 9-year-old caries free patients, how many exhibit opacities on deciduous second molars (opacities: chalky, white, yellow, beige, and/or brown spots)?

a. None
b. 1-25%
c. 25-50% d. 50-75% e. 75-100%

1. Among 6- to 9-year-old caries-free patients who have opacities of the deciduous second molars, do the permanent first molars, when present, also exhibit opacities (opacities: chalky, white, yellow, beige, and/or brown spots)?

a. Yes

b. No

1. If Yes, in what percentage?

a. 1-25%

b. 25-50%

c. 50-75%

d. 75-100%

9. Among 6- to 9-year-old caries-free patients who DO NOT HAVE opacities of the deciduous second molars, do the permanent first molars, when present, exhibit opacities (opacities: chalky, white, yellow, beige, and/or brown spots)?

a. Yes

b. No

10. If Yes, in what percentage?

a. 1-25%

b. 25-50%

c. 50-75% d. 75-100%
